# Supplementary material for: Evaluation of the Polysaccharide “Immeran” Activity in Syrian hamsters’ Model of SARS-CoV-2
Source: MDPI journal article supplement (doi:10.3390/v16030423), 2024-03-09
Supplement: s1 [file s1]

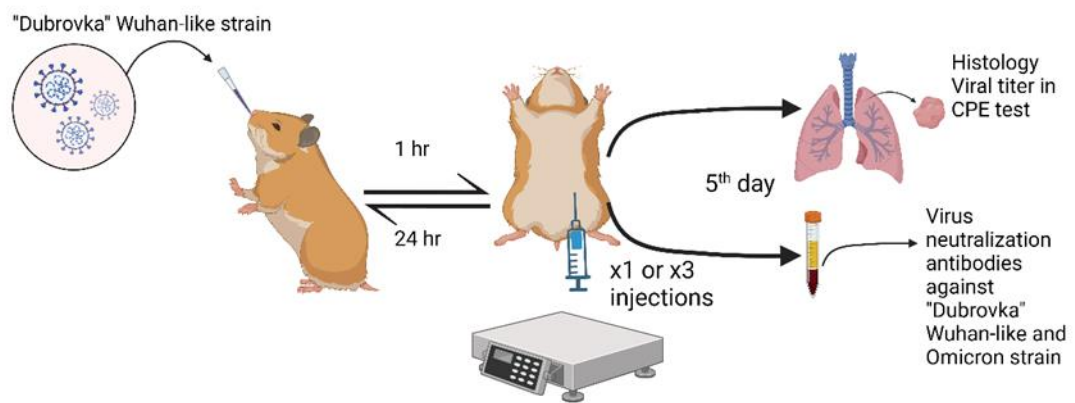

**First series** "Immeran" 0.25, 0.5 mg/kg Intraperitoneal injection or Favipiravir 1200 mg/kg and 500 mg/kg orally

**Second series** "Immeran" 0.5, 1.0 mg/kg Intraperitoneal injection

Figure 1. Flowchart of animal experiments 1 and 2.

Table. Cumulative severity scoring from H&E stained slides of lungs from golden hamsters with SARS-CoV-2-associated interstitial pneumonia and different treatment dosage and regimes using “Immeran” drug.

| Criterion for assessing the severity of the inflammatory process in the lungs | Animal group             |   |   |   |   |                                                                                               |   |   |   |   |                                                                                               |   |   |   |   |                                                                                                                               |   |   |   |   |                                                                                                                               |   |   |   |   |                                                                                                   |   |   |   |   |
|-------------------------------------------------------------------------------|--------------------------|---|---|---|---|-----------------------------------------------------------------------------------------------|---|---|---|---|-----------------------------------------------------------------------------------------------|---|---|---|---|-------------------------------------------------------------------------------------------------------------------------------|---|---|---|---|-------------------------------------------------------------------------------------------------------------------------------|---|---|---|---|---------------------------------------------------------------------------------------------------|---|---|---|---|
|                                                                               | 1<br>viral control group |   |   |   |   | 2<br>one intraperitoneal injection 0.5 mL of 250 µg/kg of “Immeran” 24 hours before infection |   |   |   |   | 3<br>one intraperitoneal injection 0.5 mL of 500 µg/kg of “Immeran” 24 hours before infection |   |   |   |   | 4<br>one intraperitoneal injection 0.5 mL of 250 µg/kg of “Immeran” 1 hour after infection and four days once every other day |   |   |   |   | 5<br>one intraperitoneal injection 0.5 mL of 500 µg/kg of “Immeran” 1 hour after infection and four days once every other day |   |   |   |   | 6<br>Favipiravir orally 1200 mg/kg 1 hour before infection, then 500 mg/kg twice a day for 4 days |   |   |   |   |
| Animal № in group                                                             | 1                        | 2 | 3 | 4 | 5 | 1                                                                                             | 2 | 3 | 4 | 5 | 1                                                                                             | 2 | 3 | 4 | 5 | 1                                                                                                                             | 2 | 3 | 4 | 5 | 1                                                                                                                             | 2 | 3 | 4 | 5 | 1                                                                                                 | 2 | 3 | 4 | 5 |
| Number of animals in group without inflammatory changes in lungs              | 0                        |   |   |   |   | 0                                                                                             |   |   |   |   | 1                                                                                             |   |   |   |   | 2                                                                                                                             |   |   |   |   | 3                                                                                                                             |   |   |   |   | 0                                                                                                 |   |   |   |   |
| Prevalence of inflammation (in points from 0 to 3)                            | 3                        | 3 | 2 | 2 | 3 | 3                                                                                             | 2 | 3 | 2 | 3 | 2                                                                                             | 0 | 1 | 2 | 3 | 0                                                                                                                             | 1 | 1 | 0 | 2 | 1                                                                                                                             | 1 | 0 | 0 | 0 | 1                                                                                                 | 2 | 2 | 1 | 1 |
| Extensive airless foci of pneumonia (in points from 0 to 3)                   | 3                        | 3 | 2 | 2 | 2 | 3                                                                                             | 2 | 2 | 3 | 3 | 1                                                                                             | 0 | 1 | 1 | 2 | 0                                                                                                                             | 1 | 0 | 0 | 1 | 0                                                                                                                             | 1 | 0 | 0 | 0 | 0                                                                                                 | 1 | 1 | 0 | 0 |
| Small scattered foci of pneumonia (in points from 0 to 3)                     | 2                        | 2 | 3 | 3 | 3 | 1                                                                                             | 3 | 2 | 2 | 3 | 2                                                                                             | 0 | 1 | 1 | 2 | 0                                                                                                                             | 2 | 2 | 0 | 2 | 1                                                                                                                             | 1 | 0 | 0 | 0 | 1                                                                                                 | 2 | 2 | 1 | 1 |
| Bronchitis, bronchiolitis (in points from 0 to 3)                             | 2                        | 2 | 2 | 2 | 2 | 2                                                                                             | 2 | 2 | 3 | 2 | 2                                                                                             | 0 | 1 | 2 | 2 | 0                                                                                                                             | 1 | 1 | 0 | 1 | 1                                                                                                                             | 1 | 0 | 0 | 0 | 1                                                                                                 | 1 | 1 | 1 | 1 |

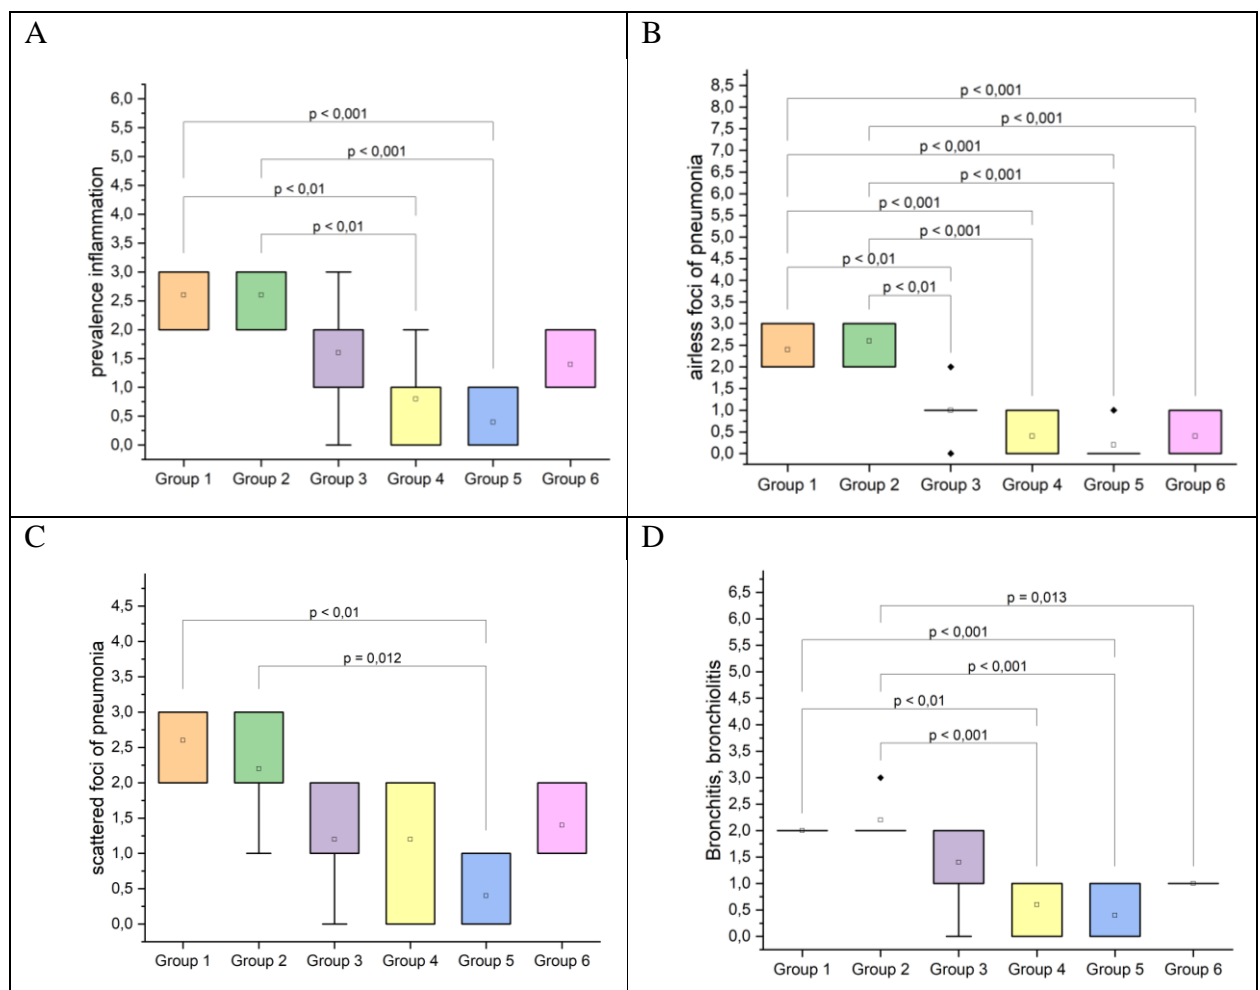

Figure 2. Statistical analysis of data from Table 1. Statistical comparisons between groups were done using unpaired Student's t-test ( $p < 0.05$ ,  $n = 30$ ). Group 1 - viral control group, Group 2 - one intraperitoneal injection 0.5 mL of 250  $\mu\text{g/kg}$  of "Immeran" 24 hours before infection, Group 3 - one intraperitoneal injection 0.5 mL of 500  $\mu\text{g/kg}$  of "Immeran" 24 hours before infection, Group 4 - one intraperitoneal injection 0.5 mL of 250  $\mu\text{g/kg}$  of "Immeran" 1 hour after infection and four days once every other day, Group 5 - one intraperitoneal injection 0.5 mL of 500  $\mu\text{g/kg}$  of "Immeran" 1 hour after infection and four days once every other day, Group 6 - Favipiravir orally 1200 mg/kg 1 hour before infection, then 500 mg/kg twice a day for 4 days.

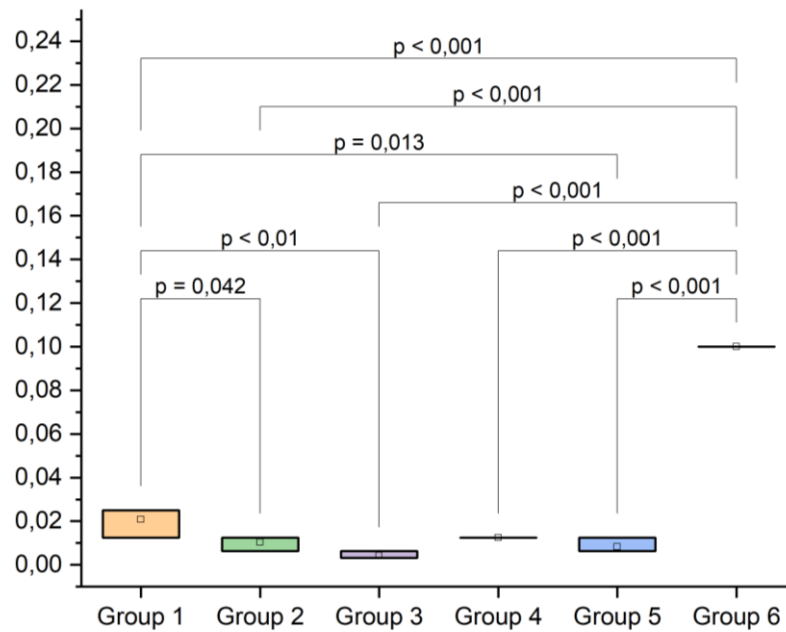

Figure 3. Statistical analysis of virus titer. Statistical comparisons between groups were done using unpaired Student's t-test ( $p < 0.05$ ,  $n = 30$ ). Group 1 - viral control group, Group 2 - one intraperitoneal injection 0.5 mL of 250  $\mu\text{g/kg}$  of "Immeran" 24 hours before infection, Group 3 - one intraperitoneal injection 0.5 mL of 500  $\mu\text{g/kg}$  of "Immeran" 24 hours before infection, Group 4 - one intraperitoneal injection 0.5 mL of 250  $\mu\text{g/kg}$  of "Immeran" 1 hour after infection and four days once every other day, Group 5 - one intraperitoneal injection 0.5 mL of 500  $\mu\text{g/kg}$  of "Immeran" 1 hour after infection and four days once every other day, Group 6 - Favipiravir orally 1200 mg/kg 1 hour before infection, then 500 mg/kg twice a day for 4 days.
